# Supplementary material for: Estimating Selection on Nonsynonymous Mutations
Source: Oxford University Press journal article supplement (doi:10.1534/genetics.105.047217), 2005-11-19
Supplement: loewe_et_al_47217.pdf [file loewe_et_al_47217.pdf]

## Estimating selection on non-synonymous mutations

Laurence Loewe, Brian Charlesworth, Carolina Bartolomé and Véronique Noël

Genetics (Accepted Nov 2005)

### Supplementary Online Material

#### Genes used in the study:

*D. miranda*: *ade3*<sup>1</sup>, *Adh*<sup>2</sup>, *amd*<sup>1</sup>, *bcd*<sup>1</sup>, *Bruce*<sup>1</sup>, *Ddc*<sup>1</sup>, *Eno*<sup>1</sup>, *Gapdh2*<sup>1</sup>, *Gld*<sup>1</sup>, *hyd*<sup>1</sup>,  
*Lam*<sup>1</sup>, *rosy*<sup>1</sup>, *scute*<sup>2</sup>, *sesB*<sup>2</sup>, *sisA*<sup>2</sup>, *sry-alpha*<sup>2</sup>, *Uro*<sup>1</sup>

1. Bartolomé, C., X. Maside, S. Yi, A. L. Grant and B. Charlesworth, 2005 Patterns of selection on synonymous and non-synonymous variants in *Drosophila miranda*. *Genetics* 169: 1495-1507.
2. Yi, S., D. Bachtrog and B. Charlesworth, 2003 A survey of chromosomal and nucleotide sequence variation in *Drosophila miranda*. *Genetics* 164: 1369-1381.

*D. pseudoobscura*: *Adh*<sup>1,2</sup>, *Amy1*<sup>3</sup>, *bcd*<sup>4</sup>, *EcR*<sup>5</sup>, *Est-5A*<sup>6</sup>, *Est-5B*<sup>7</sup>, *Est-5C*<sup>6</sup>, *eve*<sup>5</sup>, *exu-1*<sup>5,12</sup>, *Hsp82*<sup>8</sup>, *per*<sup>9</sup>, *rh1*<sup>4</sup>, *run*<sup>10</sup>, *rosy*<sup>11</sup> (Current names for the genes *Hsp82* and *rh1* are *Hsp83* and *ninaE*, respectively.)

1. Schaeffer, S. W., and E. L. Miller, 1992 Molecular population genetics of an electrophoretically monomorphic protein in the alcohol dehydrogenase region of *Drosophila pseudoobscura*. *Genetics* 132: 163-178.
2. Schaeffer, S. W., 2002 Molecular population genetics of sequence length diversity in the *Adh* region of *Drosophila pseudoobscura*. *Genet. Res.* 80: 163-175.

3. Popadic, A., and W. W. Anderson, 1994 The history of a genetic system. Proc. Natl. Acad. Sci. USA 91: 6819-6823.
4. Machado, C. A., R. M. Kliman, J. A. Markert and J. Hey, 2002 Inferring the history of speciation from multilocus DNA sequence data: the case of *Drosophila pseudoobscura* and close relatives. Mol. Biol. Evol. 19:472-88.
5. Schaeffer, S.W., M. P. Goetting-Minesky, M. Kovacevic, J. R. Peoples, J. L. Graybill, J. M. Miller, K. Kim, J. G. Nelson, W. W. Anderson, 2003 Evolutionary genomics of inversions in *Drosophila pseudoobscura*: evidence for epistasis. Proc. Natl. Acad. Sci. USA 100: 8319-8324.
6. King, L. M., The role of gene conversion in determining sequence variation and divergence in the *Est-5* gene family in *Drosophila pseudoobscura*. Genetics 148: 305-315.
7. Veuille, M, and L. M. King, 1995 Molecular basis of polymorphism at the esterase-5B locus in *Drosophila pseudoobscura*. Genetics 141: 255-262.
8. Wang R. L., J. R. Wakeley and J. Hey, 1997 Genetics 147: 1091-1161.
9. Wang R. L., and J. Hey, 1996 The speciation history of *Drosophila pseudoobscura* and close relatives: inferences from DNA sequence variation at the *period* locus. Genetics 144: 1113-1126.
10. Kovacevic, M., S.W. Schaeffer, 2000 Molecular population genetics of X-linked genes in *Drosophila pseudoobscura*. Genetics 156: 155-172.
11. Begun, D. J., and P. Whitley, 2002 Molecular population genetics of *Xdh* and the evolution of base composition in *Drosophila*. Genetics 162: 1725-1735.
12. Luk, S. K., Kilpatrick, M., Kerr, K. & Macdonald, P. M., 1994 Components acting in localization of *bicoid* mRNA are conserved among *Drosophila* species. Genetics 137: 521-30.

**Supplementary Table 1:** Summary of the data for *D. pseudoobscura*.

Columns denote:

**A:** Gene name, total number of sequences analyzed, number of codons, total number of synonymous base pairs, number of polymorphic synonymous base pairs, total number of non-synonymous base pairs, number of polymorphic non-synonymous base pairs, total number of silent sites, number of polymorphic silent sites, chromosome where the gene is located.

**B:** Average pairwise diversities ( $P_i$ ) at synonymous sites (S), non-synonymous sites (A) and silent sites (s) are given together with the ratios of uncorrected  $P_i(A)/P_i(S)$ .

**C:** WATTERSON'S estimator  $\theta_w$  (Theta). Rest, see **B**.

StDev gives the standard deviation and StErrMean the standard error of the arithmetic mean.

| <b>A</b>  | No of sqces | No codons analyzed | No of S sites analyzed | N(S) | No of A sites analyzed | N(A) | No of s sites analysed | N(s) | Chr |
|-----------|-------------|--------------------|------------------------|------|------------------------|------|------------------------|------|-----|
| Adh/Adh-r | 139         | 529                | 385                    | 132  | 1202                   | 16   | 1948                   | 439  | 4   |
| Amy1      | 7           | 494                | 350                    | 24   | 1132                   | 9    | 825                    | 52   | 3   |
| bcd       | 21          | 379                | 278                    | 33   | 859                    | 12   | 475                    | 45   | 2   |
| EcR       | 103         | 87                 | 63                     | 10   | 198                    | 0    | 132                    | 21   | 3   |
| Est-5A    | 8           | 546                | 390                    | 24   | 1248                   | 19   | 1283                   | 49   | 2   |
| Est-5B    | 17          | 545                | 385                    | 69   | 1250                   | 34   | 909                    | 88   | 2   |
| Est-5C    | 8           | 545                | 382                    | 33   | 1253                   | 13   | 1066                   | 53   | 2   |
| eve       | 101         | 101                | 76                     | 14   | 227                    | 1    | 147                    | 24   | 3   |
| exu-1     | 106         | 77                 | 52                     | 3    | 179                    | 0    | 176                    | 14   | 3   |
| Hsp82     | 12          | 240                | 158                    | 6    | 565                    | 1    | 1305                   | 34   | X   |
| per       | 16          | 314                | 228                    | 26   | 735                    | 7    | 548                    | 53   | XL  |
| rh1       | 18          | 312                | 220                    | 16   | 716                    | 2    | 725                    | 85   | 2   |
| run       | 40          | 41                 | 29                     | 5    | 94                     | 0    | 316                    | 48   | XL  |
| rosy      | 9           | 520                | 390                    | 45   | 1170                   | 16   | 390                    | 45   | 2   |

| <b>B</b>  | Pi(S)    | Pi(A)    | Pi(A)/Pi(S) | Pi (s)   |
|-----------|----------|----------|-------------|----------|
| Adh/Adh-r | 0.0269   | 0.0013   | 0.0480      | 0.0181   |
| Amy1      | 0.0269   | 0.0033   | 0.1218      | 0.0261   |
| bcd       | 0.0246   | 0.0024   | 0.0974      | 0.0186   |
| EcR       | 0.0167   | 0.0000   | 0.0000      | 0.0173   |
| Est-5A    | 0.0217   | 0.0043   | 0.1983      | 0.0144   |
| Est-5B    | 0.0401   | 0.0068   | 0.1687      | 0.0211   |
| Est-5C    | 0.0318   | 0.0037   | 0.1157      | 0.0180   |
| eve       | 0.0249   | 0.0001   | 0.0036      | 0.0236   |
| exu-1     | 0.0025   | 0.0000   | 0.0000      | 0.0074   |
| Hsp82     | 0.0079   | 0.0005   | 0.0685      | 0.0059   |
| per       | 0.0277   | 0.0021   | 0.0754      | 0.0227   |
| rh1       | 0.0149   | 0.0003   | 0.0208      | 0.0189   |
| run       | 0.0199   | 0.0000   | 0.0000      | 0.0168   |
| rosy      | 0.0338   | 0.0041   | 0.1200      | 0.0338   |
| Mean      | 0.0229   | 0.0021   | 0.0742      | 0.0188   |
| Variance  | 0.000101 | 0.000004 | 0.004310    | 0.000050 |
| StDev     | 0.0100   | 0.0021   | 0.0656      | 0.0070   |
| StErrMean | 0.0027   | 0.0006   | 0.0175      | 0.0019   |

| <b>C</b>  | Theta(S) | Theta(A) | Theta(A)/Theta(S) | Theta(s) |
|-----------|----------|----------|-------------------|----------|
| Adh/Adh-r | 0.0622   | 0.0024   | 0.0386            | 0.0409   |
| Amy1      | 0.0280   | 0.0033   | 0.1162            | 0.0257   |
| bcd       | 0.0330   | 0.0039   | 0.1176            | 0.0263   |
| EcR       | 0.0303   | 0.0000   | 0.0000            | 0.0305   |
| Est-5A    | 0.0237   | 0.0059   | 0.2474            | 0.0147   |
| Est-5B    | 0.0530   | 0.0081   | 0.1519            | 0.0286   |
| Est-5C    | 0.0333   | 0.0040   | 0.1200            | 0.0192   |
| eve       | 0.0357   | 0.0009   | 0.0238            | 0.0315   |
| exu-1     | 0.0111   | 0.0000   | 0.0000            | 0.0152   |
| Hsp82     | 0.0126   | 0.0006   | 0.0468            | 0.0086   |
| per       | 0.0309   | 0.0027   | 0.0868            | 0.0291   |
| rh1       | 0.0211   | 0.0008   | 0.0384            | 0.0341   |
| run       | 0.0399   | 0.0000   | 0.0000            | 0.0357   |
| rosy      | 0.0425   | 0.0050   | 0.1185            | 0.0425   |
| Mean      | 0.0327   | 0.0027   | 0.0790            | 0.0273   |
| Variance  | 0.000197 | 0.000006 | 0.005071          | 0.000099 |
| StDev     | 0.0140   | 0.0025   | 0.0712            | 0.0099   |
| StErrMean | 0.0037   | 0.0007   | 0.0190            | 0.0027   |
